# Supplementary material
Source: PubMed Central journal article supplement (PMC4779648)
Supplement: NIHMS759785-supplement-Supp_Fig_S1-S5.pdf [file NIHMS759785-supplement-Supp_Fig_S1-S5.pdf]

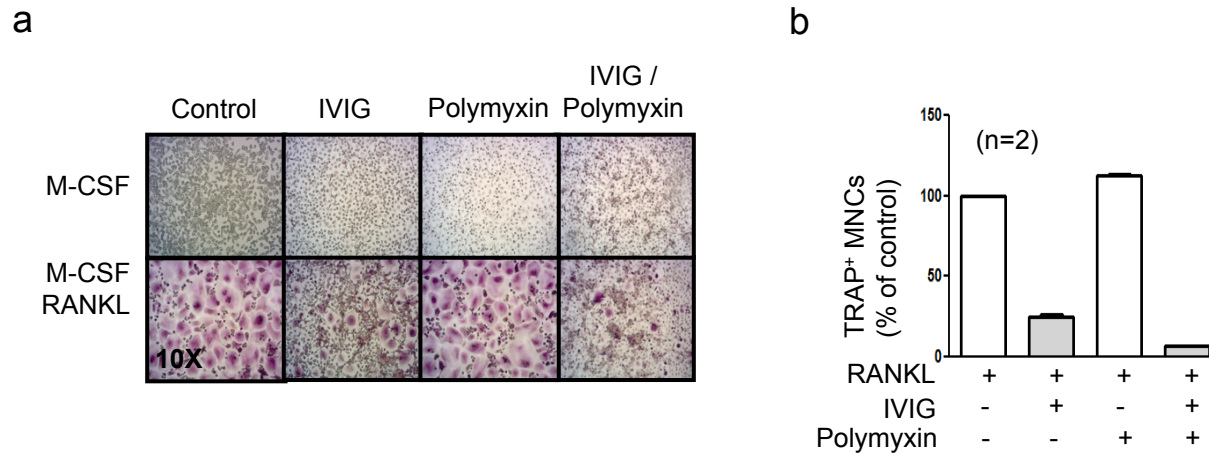

**Supplementary Fig.1 The inhibitory effects of IVIG on osteoclastogenesis are independent of LPS contamination. (a and b)** Human CD14<sup>+</sup> cells were cultured with human M-CSF (20 ng/ml) in the presence or absence of IVIG (1mg/ml) for one day. Polymyxin (0.28 µg/ml) was added to cells at the beginning of culture. RANKL (40 ng/ml) was added to the cultures for 5 additional days. (a) Representative results from one experiment out of two experiments performed are shown. (b) TRAP-positive, multinucleated (more than three nuclei) cells were counted in triplicate. The number of osteoclasts generated by RANKL alone is set as 100% for each individual blood donor. Data are shown as mean ± SEM from two independent donors.

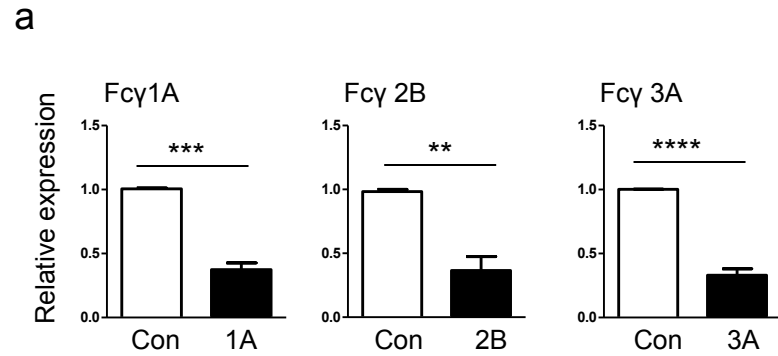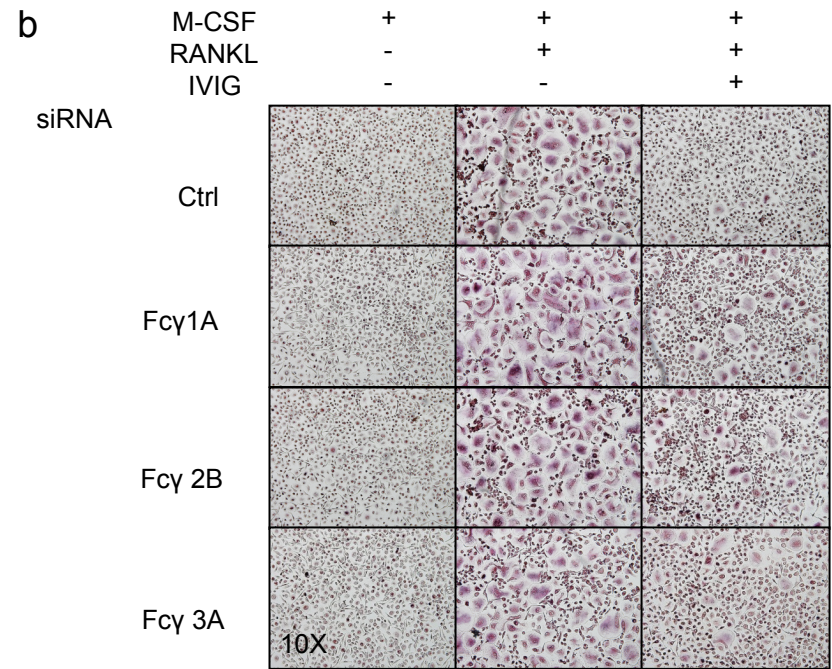

**Supplementary Fig.2 The role of other Fcγ receptors in IVIG-induced suppression of osteoclastogenesis. (a and b)**

Human monocytes were nucleofected with control or FcγR1a, 2b, an 3a -specific small interfering RNAs (siRNAs). **(a)** Knock-down efficiency was measured by RT-qPCR and normalized relative to the expression of GAPDH. \*\* $p < 0.01$ ; \*\*\* $p < 0.001$ ; \*\*\*\* $< 0.001$  by paired  $t$ -test. **(b)** TRAP-positive, multinucleated osteoclast formation was visualized by TRAP staining. *Upper panel*, Representative results. *Lower panel*, Values are the mean  $\pm$  SEM from at least three experiments. The number of osteoclasts obtained from control siRNA is set as 100%. “—” represents the average. We did not find any statistically significant difference in osteoclast numbers among IVIG treated conditions by one-way ANOVA.

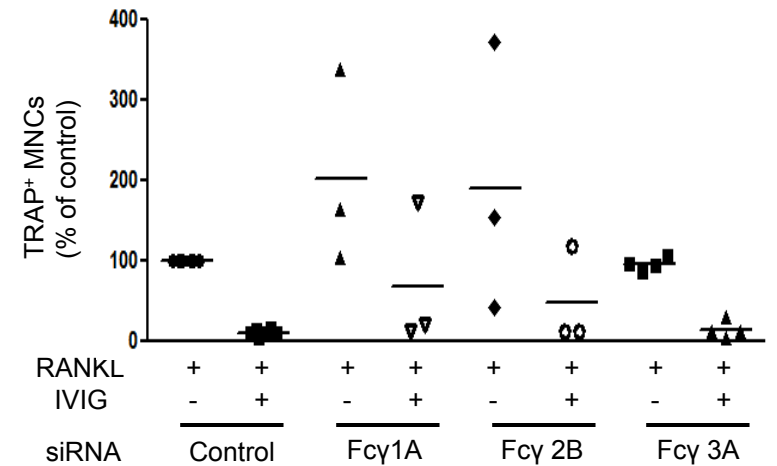

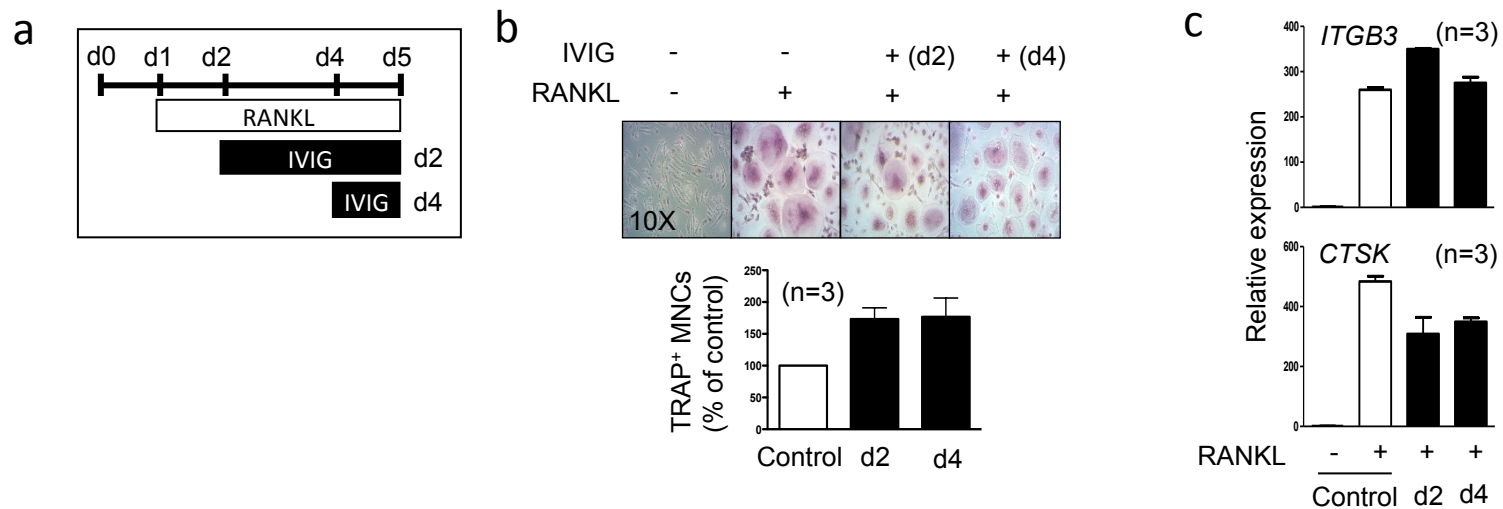

**Supplementary Fig.3 IVIG does not inhibit human osteoclastogenesis when added after RANKL stimulation.** Cells were cultured with RANKL for one or three days and then IVIG was added to the culture. **(a)** Experimental scheme, IVIG was added after RANKL. **(b) Upper panel,** Representative results. **Lower panel,** The number of osteoclasts generated by RANKL alone is set as 100%. Values are the mean  $\pm$  SEM. **(c)** Cells were cultured as in a, and mRNA was measured using RT-qPCR. Data are shown as mean  $\pm$  SEM. \*;  $P < 0.05$ ; \*\*;  $P < 0.01$  by one way ANOVA.

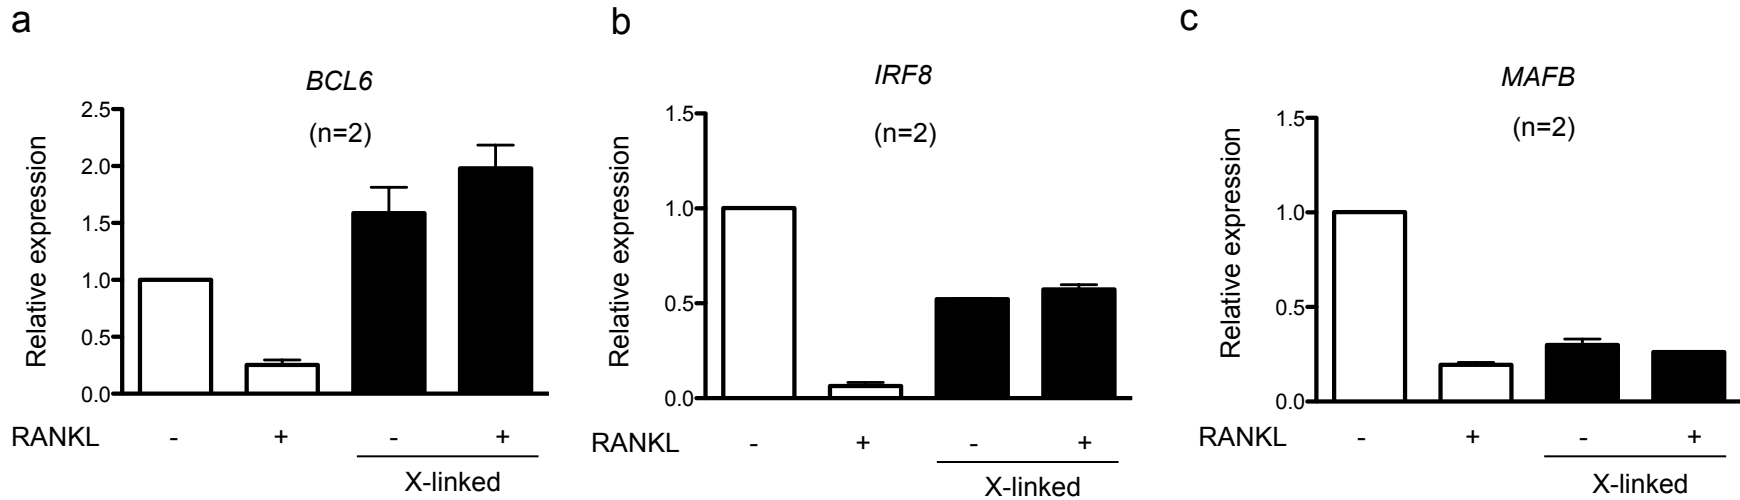

**Supplementary Fig.4 Regulation of transcriptional repressors of osteoclastogenesis by RANKL and Fcγ receptor crosslinking.** (a-c) Human monocytes were cultured on IgG coated plates for one day with human M-CSF (20 ng/ml) and then RANKL (40ng/ml) was added for 24 hours. mRNA of (a) BCL6 (b) IRF-8 and (c) MAFB was measured by RT-qPCR and normalized relative to the expression of GAPDH. Data are shown as mean ± SEM from two independent donors.

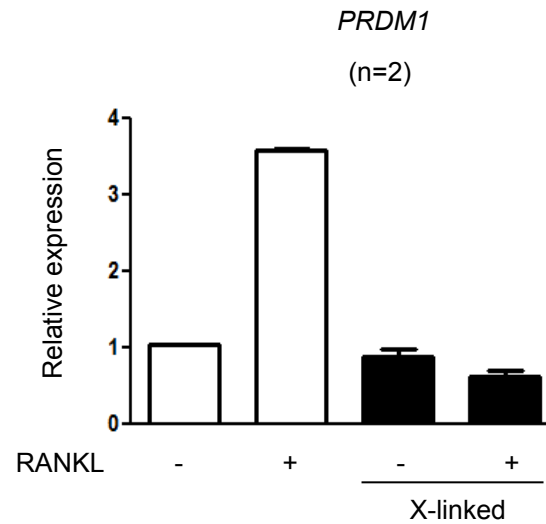

**Supplementary Fig.5 RANKL-induced Blimp1 expression is suppressed by Fcγ receptor crosslinking.** Human monocytes were cultured on IgG coated plates for one day with human M-CSF (20 ng/ml) and then RANKL (40ng/ml) was added for 24 hours. BLIMP1 mRNA was measured by RT-qPCR and normalized relative to the expression of GAPDH. Data are shown as mean ± SEM from two independent donors.
